# Integrating movement behavior with sexual selection in the lizard *Anolis sagrei*.

Ambika Kamath<sup>1,2,3</sup> and Jonathan B. Losos<sup>1,4</sup>

1. Department of Organismic and Evolutionary Biology and Museum of Comparative Zoology, Harvard University, 26 Oxford Street, Cambridge MA 02138
2. *Present Address:* Department of Ecology, Evolution and Marine Biology, University of California Santa Barbara, Santa Barbara, CA 93106
3. Author for correspondence. Email: [ambikamath@gmail.com](mailto:ambikamath@gmail.com)
4. Email: [jlosos@oeb.harvard.edu](mailto:jlosos@oeb.harvard.edu)

## Abstract

Individuals' locations in space and time determine their potential social and reproductive interactions, and thus the extent to which they experience sexual selection. However, movement behavior is rarely considered when quantifying sexual selection. We used an explicitly spatiotemporal Markov chain modelling approach to estimate the number of potential mates of male and female *Anolis sagrei* lizards from their movement behavior, and used genetic paternity assignments to complement and corroborate our model results. Females frequently encountered and mated with multiple males, offering ample opportunity for sexual selection through female choice. Further, sexual selection favored larger spatial extents and larger body sizes in males, though the effect of body size is difficult to disentangle from evidence for last-male precedence. We posit that explicitly spatiotemporal quantifications of space-use behavior could help to reconcile widespread dissonance across studies of mating systems in animals, and will be necessary for quantifying sexual selection in the wild.

**Keywords:** mating system, territory, territoriality, polygyny, sexual selection, *Anolis sagrei*, anole, encounter rates, movement

## 17 Introduction

18       Knowing the locations of males and females in both space and time is crucial to predicting  
19       mating patterns and quantifying the opportunity for sexual selection (Emlen & Oring 1977; Wade  
20       1995; Shuster & Wade 2003). Animals' movement patterns are a likely target of sexual selection  
21       because how individuals move across space through time can directly influence the number of  
22       potential mates they encounter (Wagner 1998; Kvarnemo & Simmons 2013). But by bringing about  
23       such encounters between potential mates as well as between potential competitors, individuals'  
24       movement patterns also set the stage for subsequent sexual selection through male-male  
25       competition and female choice acting before or after copulation (Jones 2009). Integrating movement  
26       behavior as both a target and a facilitator of sexual selection is thus a central challenge for  
27       understanding how sexual selection acts in the wild.

28       In particular, individuals' movement patterns constrain the potential for female choice to  
29       drive sexual selection. The extent to which female mate choice exerts sexual selection on males in  
30       natural populations remains contentious, as do the precise mechanisms by which female mate choice  
31       arises and is maintained (reviewed in Jones & Ratterman 2009; Firman *et al.* 2017). Common to all  
32       models of female choice, however, is the idea that females have the opportunity to choose among  
33       males. But whether and to what extent individual females in fact have such a choice depends in large  
34       part on how many males they encounter (Morris 1989; Wagner 1998). Failing to account for how  
35       movement behavior facilitates social interactions can therefore lead to a dissonance between  
36       experimental studies offering females a choice between males, and field studies documenting mating  
37       systems that only rarely allow females to choose among males (Dougherty & Shuker 2015)—if the  
38       latter studies are true, then the former are largely irrelevant. Thus incorporating movement behavior  
39       is integral to formulating a holistic view of sexual selection.

40       In this paper, we develop an explicitly spatiotemporal approach to estimate the number of  
41       potential mates from observations of the movement behavior of male and female *Anolis sagrei*  
42       lizards, to understand what mating patterns are possible in the sampled population. In particular, we  
43       investigate if females encounter multiple males, which could offer females the possibility of mate  
44       choice. We use genetic methods to confirm that females do in fact mate with multiple males, and  
45       then characterize sexual selection in this population by examining the predictors of male  
46       reproductive success at two levels. First we ask if the number of potential mates encountered by

males is associated with either the spatial extent of their movements or their body size. Second, we test three hypotheses to understand which of the males that females encounter end up siring offspring. We first examine if females bear offspring sired by the males they encounter more often (Kokko & Mappes 2012). Then, we ask if males encountered later in the breeding season are more likely to sire offspring than males encountered earlier (“last-male precedence”; Birkhead & Hunter 1990). Finally, given widespread sexual selection in animals for larger males (Andersson 1994), as well as pronounced male-biased sexual size dimorphism in *A. sagrei*, we ask if females disproportionately bear offspring sired by larger males. We find evidence that females both encounter and mate with multiple males, and that sexual selection acts on movement behavior, male-female interactions, and body size in male *A. sagrei*, suggesting the possibility for complex polygynandrous reproductive dynamics including both pre- and post-copulatory mate choice.

## Methods

### *Field sampling and egg collection*

*Anolis sagrei* is a low-perching arboreal lizard native to Cuba and the Bahamas that has been established in Florida for nearly a century (Kolbe *et al.* 2004; 2008). It co-occurs with the native, higher-perching *Anolis carolinensis* throughout most of its range in the US, including in our sampled population; however, few interactions between the two species were observed.

*Anolis sagrei* lizards were captured, marked, and monitored to estimate their movement patterns in the University Gardens on the University of Florida campus in Gainesville, FL, from March 4, 2015 to May 25, 2015 between 0900 and 1800 hours. The start date of sampling coincided approximately with the increased activity of these lizards after the winter and the beginning of the breeding season; we concluded sampling at about the time at which female *A. sagrei* began laying eggs. We caught almost every lizard within a 7140 m<sup>2</sup> area and marked each captured individual with a unique bead tag (Fisher & Muth 1998), which allowed us to subsequently observe and identify individuals from a distance without disturbing them (in total, 4% of observations were of unmarked individuals). When captured, we measured each individual’s snout-vent length (SVL) as a measure of body size, and removed ~2-3 cm of tail tissue for genetic analysis. At each subsequent observation of a lizard, we noted its identity as well as the time and location of the observation. We avoided

observing the same individual more frequently than once per hour, allowing ample time for lizards to resume normal behavior if disturbed by us. Approximately once a month, we recaptured and re-measured males to estimate the average growth rate of males in this population.

We measured distances between the locations at which lizards were observed to triangulate their relative positions. In areas of continuous vegetation, locations more than 1m apart were considered distinct. We also mapped the location of all trees within the site at which lizards were not observed, to include all trees to which a lizard could potentially have moved in our estimations of their movement patterns.

At the end of the observation period, we captured 36 marked females and brought them into captivity. Females were housed singly under established anole husbandry conditions (Sanger *et al.* 2008) until mid-November. Each cage contained a pot of soil in which the resident female laid eggs fertilized by sperm stored from her copulations in the field. Eggs were incubated for two to ten days, after which embryos were dissected from them for genetic analysis.

#### *Movement pattern analysis*

Analyses were carried out in R v. 3.3.2 (R Core Team 2016). We used a discrete-time Markov chain to model lizards' movements between the mapped locations in the site. We divided daytime hours (0800 to 2000 hours; anoles are diurnal, so we assumed that the lizards did not move at night) over the sampling period (83 days) into 996 hour-long blocks. Observations were assigned to the bin closest to the time of the observation. Transition probabilities ( $P_{ij}$ ) between locations  $i$  and  $j$  were modelled as exponentially declining with the distance between the locations ( $d_{ij}$ ), with rows of the transition matrix then normalized to sum to one ( $N$  is the total number of locations):

$$P_{ij} = \frac{e^{-\lambda d_{ij}}}{\sum_{j=1}^N e^{-\lambda d_{ij}}} \quad (\text{Equation 1})$$

In other words, lizards were modelled as less likely to move to distant locations than to close locations, with a total probability of 1 of moving from each location to *some* location within the site, including staying at the same location. The value of the exponential decline parameter  $\lambda$  was estimated by maximizing the likelihood of the observed data using the *bbmle* package (Bolker & R Development Core Team 2016); separate models were fit for males and females.

The probability that a lizard was at a particular location at a particular hour was inferred using the Markov chain model described above. Methodological details can be found in the Supplementary Information below and data and code can be found at <https://github.com/ambikamath/anolismovt> but briefly, this probability depended not only on where that lizard was seen previously but also where it was seen next. We thus calculated, for each lizard, a matrix of probabilities that it occupied a particular location at a particular hour, for all locations and hours. Then, we performed element-wise multiplication of pairs of these matrices to calculate the probability of co-occurrence at each one hour-long time bin, for every possible pair of lizards. Encounters were categorized for each pair at each hour (“yes/no”) from these probabilities by setting cutoffs based on the co-occurrence probabilities calculated for pairs of lizards observed in the same location within an hour of one another. For each hour, we inferred an encounter between a pair of lizards if their co-occurrence probability was larger than the cutoff.

To quantify potential mating opportunities for each individual, we calculated the number of females encountered by each male and the number of males encountered by each female, as revealed by our model. The proportion of females that encounter multiple males and the mean number of males encountered by females reveal the extent to which multiple mating by females is possible in this population.

We quantified the spatial extent of an individual’s movement by calculating the mean of the distances from each observation of the individual to the centroid of all observations of the individual (mean distance from centroid). Lower mean distance from the centroid indicates smaller spatial extent. We jittered points randomly within a 0.5 m radius along both the X and Y axis of our site before calculating mean distance from the centroid to account for the 1 m resolution at which locations were mapped.

We estimated a growth curve for males by fitting a logistic equation to males’ SVL measured initially and at recaptures, using nonlinear least squares regression (Schoener & Schoener 1978; see Supplementary Information). We used this logistic growth curve to estimate the SVL of each male on the day of each of his inferred encounters, based on his SVL at the nearest capture, to test for sexual selection on male body size and male avoidance of size-matched males (see below).

## Parentage analysis

DNA was extracted from the 36 females housed in captivity, all 161 sampled males, and 383 offspring using an AutogenPrep 965. Six microsatellite regions were amplified for these individuals (see Table S1 for primer and amplification protocol details; Bardeleben *et al.* 2004; Wordley *et al.* 2011), with fragment analysis performed at the DNA Analysis Facility at Yale University. Alleles were scored manually after examining chromatogram peaks in Geneious v10.0.9 (Kearse *et al.* 2012).

Parentage analyses were performed in CERVUS v3.0.7 (Kalinowski *et al.* 2007). High proportions of null alleles were estimated at three loci (Table S1); following Le Bas (2001) and Husak *et al.* (2006), we retained these loci in the analysis but typed apparent homozygotes at only one allele, with the other allele coded as missing. All offspring had known mothers, and we provided as candidate sires for each offspring the list of males that its mother was estimated to have encountered, as described above. In the simulation to determine LOD score cutoffs for assignment, we provided a genotyping error rate of 0.01 (based on mother-offspring mismatch across all loci); the proportion of loci typed was 0.81. Simulations were run with 23 candidate sires and the proportion of sires typed set to 0.75, based on the maximum number of males encountered by any female in the population (17 males). These parameters were chosen after running preliminary analyses with simulations in which the proportion of sires typed was set to 0.25, 0.5, or 0.75 and the number of candidate sires set correspondingly to 68, 34, or 23; following Rasmussen *et al.* (2008), we chose the parameter combination with the closest match between the proportion of sires typed and the observed assignment rate. We performed further analyses to test the effects of restricting the number of candidate sires relative to the whole population, and of providing all sampled males as candidate sires for all offspring. Detailed methods and results for these analyses are in the Supplementary Information.

## Hypothesis Testing

The number of potential mates encountered and spatial extent (mean distance to the centroid) had right-skewed distributions, and were therefore log-transformed before parametric analyses; SVL was analyzed untransformed. We compared spatial extent between males and females using a t-test weighted by the number of observations per individual, and investigated if variation in males' spatial extent was related to body size, using a linear regression of SVL at first capture vs. mean distance to the centroid, weighted by the number of observations per individual.

Next, we examined if the number of females encountered by males varied with the spatial extent of males' movement (mean distance from the centroid) and with mean male body size at their encounters with females, using a multiple linear regression weighted by the number of observations per individual.

To assess if males avoided size-matched males, we examined the differences in estimated SVL between pairs of males estimated to encounter one another, and compared these differences to the differences in estimated SVL between randomly chosen pairs of males. For males that were estimated to encounter one another, we used the logistic growth curve to estimate their SVL on the day of the encounter. We initially sampled five random pairs per pair of males estimated to encounter one another, estimated their SVLs on the same day as the corresponding encounter, and eliminated random pairs in which either individual had an estimated SVL less than the minimum observed SVL. We then repeated this random sampling a total of 100 times to assess if the number of male-male encounters among size-matched males (estimated SVL difference of 0-2 mm) was significantly lower than expected by chance.

We used a resampling approach to examine (1) if males who sired individual females' offspring encountered the mother significantly more often than males who encountered the same females but did not sire offspring (encounter rate hypothesis), (2) if males who sired individual females' offspring encountered those females later than males who encountered the same females but did not sire offspring (last-male precedence hypothesis) and (3) males who sired individual females' offspring were bigger than males who encountered the same females but did not sire offspring (body size hypothesis).

We first calculated the difference between medians of the number of encounters between male-female pairs for sires and non-sires across all offspring. We also calculated, for each male-female pair, the last hour at which the pair encountered one another and maximum SVL estimated for the male across all encounters between the pair as an estimate of male body size, and then calculated the difference between median hour of last encounter and median body size between sires and non-sires. We then recalculated these differences between medians after randomly assigning each offspring a sire from the set of males that encountered the mother of that offspring.

Random sire assignments were performed in two ways. To address hypothesis (1), we sampled uniformly from the list of males encountered by each mother. Then, to address hypotheses



(2) and (3), we sampled in proportion to the rate at which each male encountered each mother. The former allowed us to test if sires encountered mothers more often than did non-sires, and the latter allowed us to test if later-encountered males and bigger males sired offspring more often than earlier-encountered males and smaller males, after accounting for variation across males in encounter rates. Each resampling was repeated 10000 times.

## Results

A total of 253 individuals (161 males, 92 females) were caught and marked during the sampling period, and were observed a total of 5629 times. The number of observations per individual ranged from one to 128; the median number of observations per individual for males and females was 11 and 15 respectively.

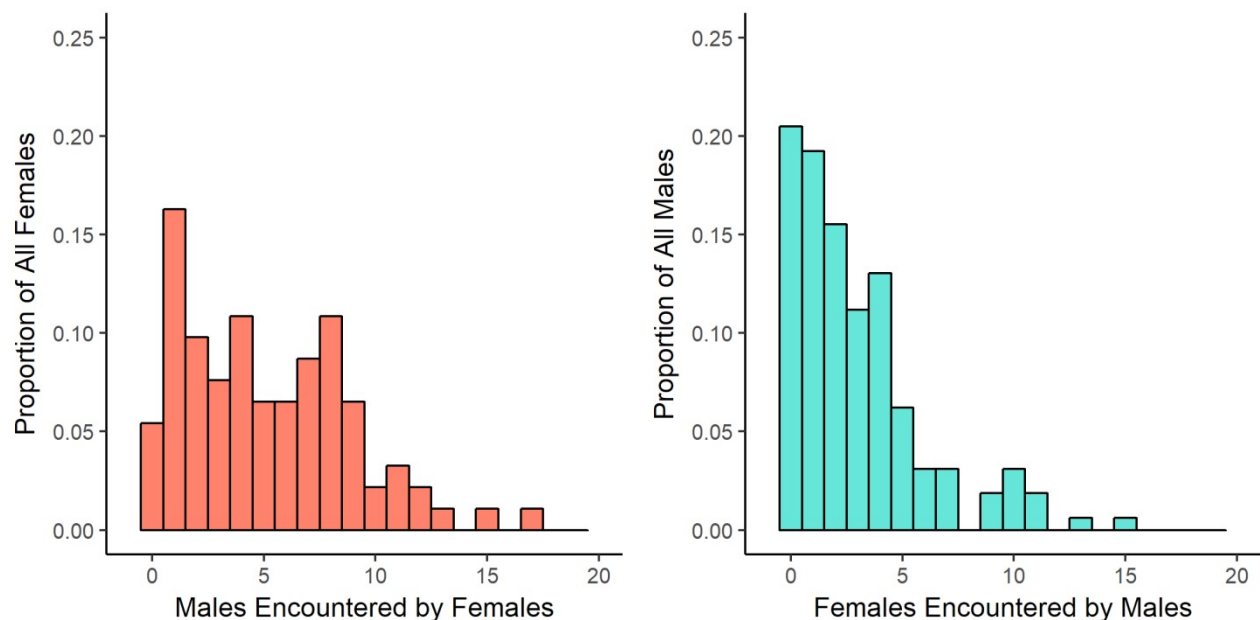

**Figure 1.** Histograms of the number of males encountered by females (left) and females encountered by males (right).

We used a Markov chain to model lizards' movements between locations in the site, where transition probabilities were modelled as exponentially declining with the distance between locations. We estimated  $\lambda$  values of -0.78 and -1.27 for males and females respectively (see Equation 1), indicating that males were more likely than females to move longer distances. Using this Markov



chain model to estimate individuals' movement patterns, we calculated that females encountered  $5.1 \pm 3.7$  males (mean  $\pm$  S.D.) and males encountered  $2.9 \pm 3.0$  females; 78% of females and 60% of males encountered multiple individuals of the opposite sex (Figure 1). Males encountered an average of  $4.5 \pm 3.6$  other males.

The mean distance from the centroid of all of an individual's locations ranged from 0.2 m to 41.3 m for males and from 0.2 m to 20.8 m for females (mean  $\pm$  standard deviation for males vs. females:  $6.8 \pm 7.0$  m vs.  $2.7 \pm 3.3$  m;  $t = 8.1$ ,  $df = 208.7$ ,  $P < 0.001$ ). This measure of spatial extent was weakly associated with SVL at initial capture for males ( $r^2 = 0.04$ ,  $F_{1,135} = 4.91$ ,  $P = 0.03$ ).

To estimate male body size at their encounters with females using a logistic growth curve, we recaptured 68 males and re-measured their SVLs a total of 94 times, with  $32 \pm 15$  (mean  $\pm$  SD) days elapsed between measurements. The mean difference in estimated SVL between pairs of males estimated to encounter one another ( $7.1 \pm 4.5$  mm) was comparable to the mean difference between randomly chosen pairs of males ( $7.4 \pm 5.7$  mm). However, observed size differences were underrepresented in the smallest (0-2 mm) category compared to random pairwise size differences (0.11 vs.  $0.18 \pm 0.002$ ;  $P < 0.01$ ; Figure 2).

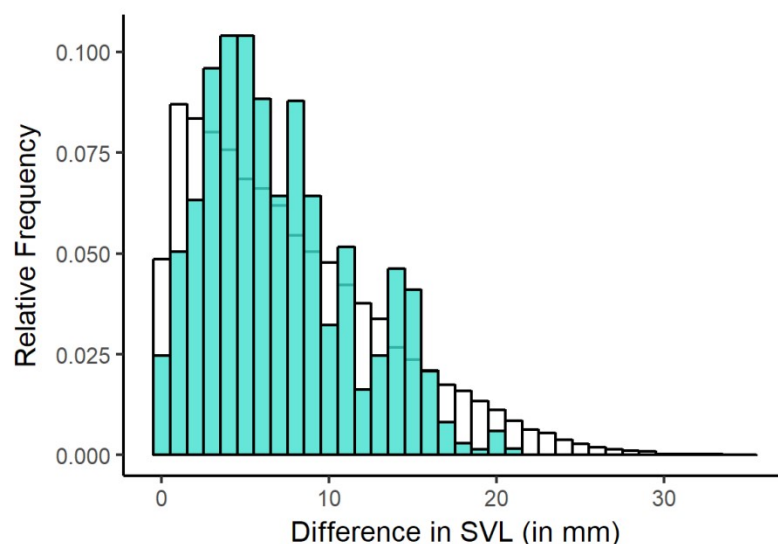

**Figure 2.** Estimated SVL differences between male pairs estimated to co-occur (blue bars), compared with pairwise SVL differences between randomly chosen pairs of males, with random males' sizes estimated on the same days at the observed co-occurrences (white bars).

222 Males that encountered more females had a greater spatial extent ( $r^2 = 0.10$ ,  $F_{1,113} = 13.0$ ,  $P$   
223  $<0.001$ ; Figure 3) and were larger in size on average at their encounters with females ( $r^2 = 0.09$ ,  $F_{1,113}$   
224  $= 13.0$ ,  $P <0.001$ ; Figure 3); the interaction between spatial extent and SVL was not significant ( $r^2 =$   
225  $0.0$ ,  $F_{1,113} = 0.03$ ,  $P = 0.87$ )

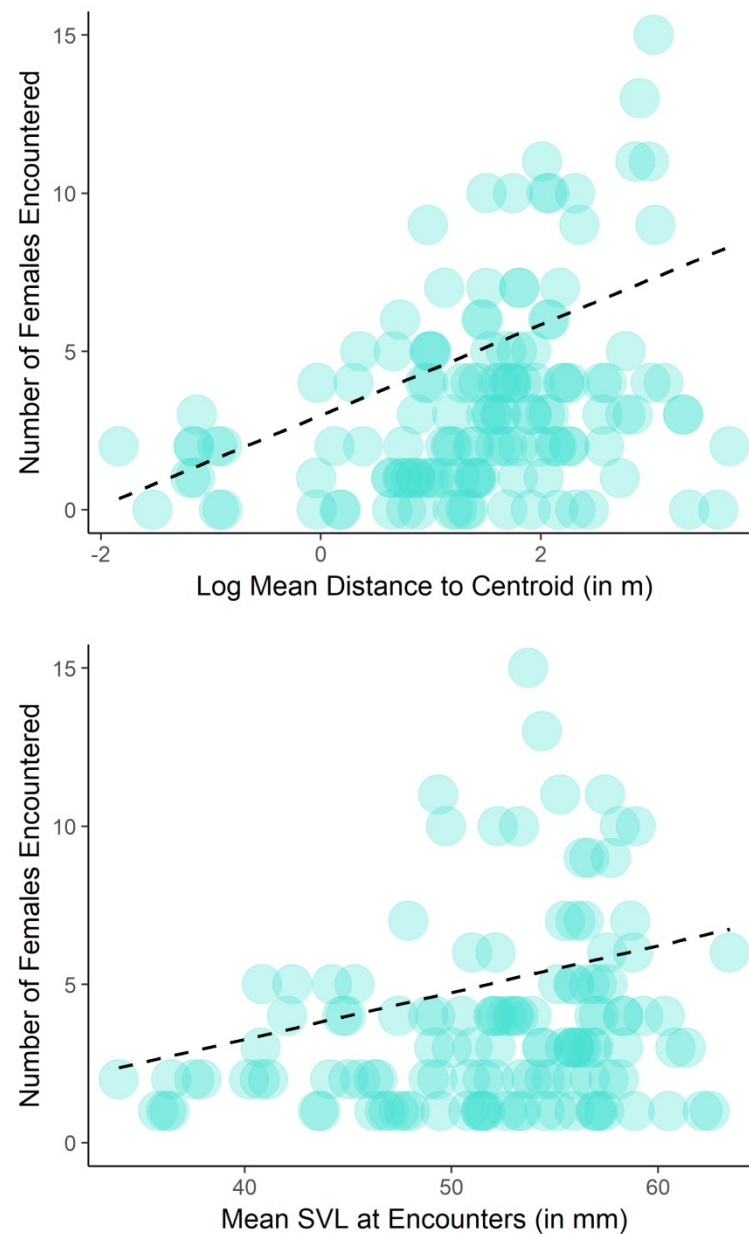

**Figure 3.** Relationship between the number of females encountered by males and the males' spatial extent (top; measured as the mean distance to the centroid) and males' mean estimated SVL across encounters (bottom).

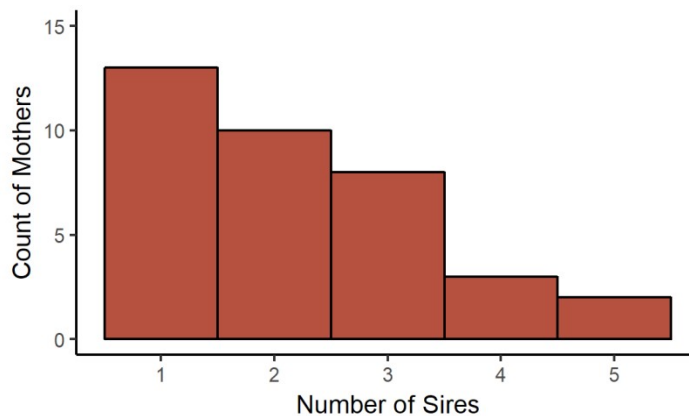

**Figure 4.** Histogram of the number of sires of females' offspring; 64% of females bore offspring sired by more than one male.

226 Under the parentage analysis in which we set the potential sires for each offspring to be the  
 227 males estimated to have encountered their mother, paternity was assigned to 84% of all offspring  
 228 (323 individuals) at an 80% confidence level. We found that 64% of mothers bore offspring sired by  
 229 more than one male (Figure 4); including offspring with unassigned sires, this proportion rose to  
 230 81%. Using a resampling approach, we found that sires of offspring encountered mothers  
 231 significantly more often than did non-sires (median number of encounters between mothers and  
 232 sires: 40; non-sires: 17;  $P < 0.0001$ ). Accounting for variation across males in how often they  
 233 encounter mothers, we found that sires encountered females significantly later than non-sires  
 234 (median of the last hour of encounter for sires: 955; non-sires: 648;  $P < 0.0001$ ) and were  
 235 significantly bigger than non-sires (median of the maximum male SVL across encounters for male-  
 236 female pairs, for sires: 58.4 mm; non-sires: 54.2 mm;  $P < 0.0001$ ; Figure 5).

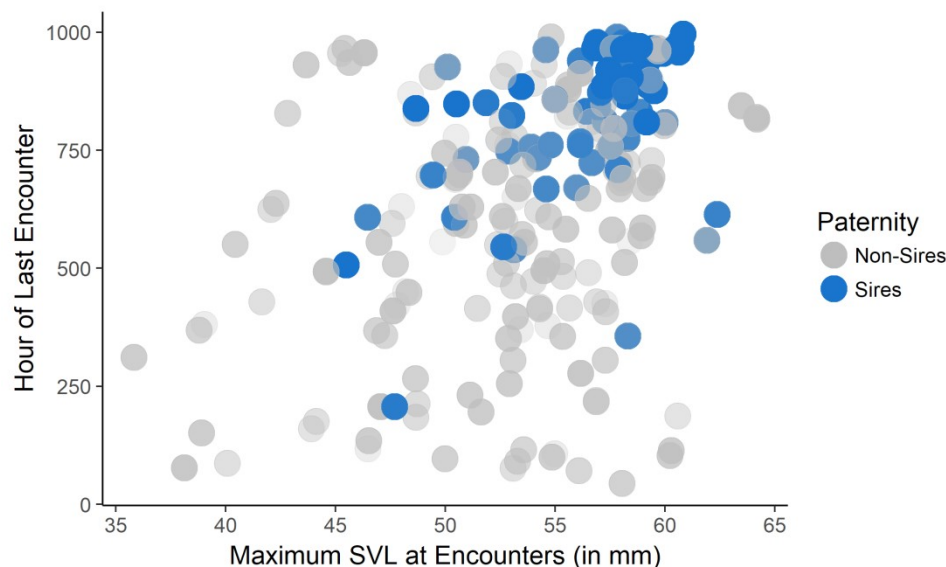

**Figure 5.** Maximum male snout-vent length (SVL) and the hour of last encounter for male-female pairs, colored by whether or not the male sired any of the female's offspring.

## 238 Discussion

239 Understanding the relationship between animals' movement patterns, mating patterns, and  
240 reproductive success is essential not only for characterizing the mating system of a population or  
241 species but also for determining how movement behavior both facilitates and is shaped by sexual  
242 selection. In particular, female mate choice can contribute to sexual selection in natural populations  
243 only if individuals' movement patterns give females the opportunity to choose among mates.

244 Developing a spatiotemporal characterization of the movement patterns of a population of  
245 *A. sagrei* lizards, we found that a majority of females (78%) encountered multiple males over the first  
246 three months of the breeding season. Moreover, a majority of females (64%–81%) bore offspring  
247 sired by multiple males, indicating the potential in *A. sagrei* for complex polygynandrous mating  
248 patterns.

249 Previous behavioral descriptions of movement patterns and mating systems in *Anolis* lizards  
250 have leaned heavily on, and been constrained by, the framework of territoriality (Kamath and Losos  
251 2017). These descriptions were often coupled with an implicit expectation that anoles mate strictly  
252 polygynously, i.e., males mate with multiple females, but females mate with just the one male in  
253 whose territory they reside. Consequently, field studies have often implied that the opportunity for  
254 female choice in anoles is limited because it is precluded by territoriality (e.g. Schoener & Schoener  
255 1980; Stamps 1983; Jenssen *et al.* 2001; but see Tokarz 1998). However, all the genetic evidence  
256 collected so far suggests that female anoles frequently mate with multiple males (Passek 2002;  
257 Calsbeek *et al.* 2007; Johnson 2007), indicating that the potential for female mate choice exists in  
258 anoles. Concurrently, despite varying evidence as to whether female choice is even possible in  
259 natural populations, laboratory studies have offered females the choice between males to assess  
260 precopulatory mate preference (Andrews 1985; Lailvaux & Irschick 2006; Flanagan & Bevier 2014)  
261 and have mated females with multiple males to assess postcopulatory sexual selection (Calsbeek &  
262 Bonneaud 2008; Cox & Calsbeek 2010). Our demonstration that individual *A. sagrei* lizards in a  
263 natural population move such that females frequently encounter and mate with multiple males  
264 indicates that female anoles definitely have the opportunity to exert post-copulatory mate choice;  
265 moreover, depending on the time-scale of mating decisions, females might also exert pre-copulatory  
266 mate choice. This implies that lab-based studies of female choice can be biologically relevant, and  
267 calls into question the utility of territorial polygyny as a description of these lizards' mating system.

That said, territoriality is a multi-faceted concept, pertinent not only to reproductive interactions but also to habitat selection, space use behavior, and social interactions among males (Maher and Lott 1995). Our results support long-standing views in some of these facets. We found that males are more likely to move greater distances and had a greater spatial extent than did females, which is consistent with previous estimates of sex differences in territory size (e.g. Schoener & Schoener 1982; Jenssen & Nunez 1998), and with evidence for male-biased dispersal in anoles (Johansson *et al.* 2008; Calsbeek 2009). But the spatial extent of individuals in this population is orders of magnitude higher than previous estimates of territory size in this and ecologically similar species (e.g.  $\sim 3 \text{ m}^2$  for females and  $\sim 10 \text{ m}^2$  to  $\sim 14 \text{ m}^2$  for males; Rand [1967]; Schoener & Schoener [1982]; Calsbeek & Marnocha [2006]). Although it is always possible that lizards in our site behaved unusually or, more generally, that movement behavior varies across populations and species, the discrepancy may also be due in part to limited spatial and temporal sampling in previous studies leading to underestimates of anole space use. Limited sampling may also partially underlie why female multiple mating has rarely been considered important in past research on anole territoriality—studies with limited spatial or temporal sampling extents will be constrained in what behaviors they can detect (Kamath and Losos 2017). Indeed, subsampling from our dataset shows that if we had limited our spatial or temporal sampling extent to match the median sampling of previous studies, we would have detected a greatly reduced number of male-female pairs whose home ranges overlap with one another (see Supplementary Information). In sum, we posit that while certain tenets of territoriality are well-supported in anoles, previous studies have likely underestimated the complexity of *Anolis* lizards' movement patterns and social interactions by being constrained by a territorial framework. Future studies of movement patterns that explicitly do not depend on a territorial framework, conducted in a diversity of populations and species across a range of habitats and densities, will be necessary to determine if we are correct.

Larger males encountered more females and were more likely to sire offspring than smaller males. These results are consistent with conventional wisdom in anoles that larger males achieve higher reproductive success than smaller males (Losos 2009), and, more generally, with evidence from across animals that body size in males predicts reproductive success (Andersson 1994). However, most previous evidence in favor of this hypothesis in anoles is based on the estimation of mating patterns from home range area and overlap within the framework of territoriality (e.g. Schoener & Schoener 1982; Ruby 1984). More recent genetic evidence has been less definite,

including no difference or marginal trends towards larger males siring more offspring in the wild (Johnson 2007; Harrison 2014) and in lab experiments (Cox & Calsbeek 2010). In contrast to this equivocal evidence, all evidence from our study points to sexual selection favoring larger body size in males, helping to explain the marked male-biased sexual size dimorphism seen in this species. As a species with largely indeterminate growth, body size in these lizards can be an indicator of age (Schoener & Schoener 1980; Stamps 1993), or the ability to survive and thrive, suggesting an adaptive reason for females to choose to mate with or bear offspring sired by larger males (Cooper & Vitt 1993).

Selection on body size is difficult to disentangle from the possibility that large males sire more offspring simply because they have encountered and mated with females more recently than have small males. Last-male precedence is found in many animals (Birkhead & Hunter 1990), including reptiles (e.g. Friesen *et al.* 2014), but previous evidence from laboratory experiments in *A. sagrei* suggests instead that the first male to mate with a female is more likely than a later male to sire offspring (Duryea *et al.* 2013). More targeted laboratory experiments could readily separate size effects from mating order effects, lending insight into the mechanisms by which post-copulatory mate choice may act in these animals. But in nature, these two effects may be largely concordant—males mated with later in the mating season are likely to be bigger *simply because* they have grown since earlier in the season.

Additionally, sexual selection may act on movement behavior—males with larger spatial extents encountered more females than males with smaller spatial extents. Because male body size and spatial extent were only very weakly correlated, the results do not indicate strong ontogenetic shifts in movement behavior. Thus, it appears that there are multiple ways for males to achieve reproductive success—they can grow large, and they can traverse large areas. Our results are similar to those of Noble *et al.* (2013), who found evidence for independent effects of body size and home range area on reproductive success in male skinks, *Eulamprus quoyii*.

However, understanding how the effects of body size, spatial extent, and last-male precedence integrate with the processes of males first encountering females and then siring their offspring is not necessarily straightforward. In particular, it remains unknown, but is unlikely, that a single movement or mating strategy can be adaptive in the face of such social complexity. Instead, animals may make decisions about movement depending on their social and environmental context,



as opposed to adopting fixed patterns of space-use. Such context-dependent decision making is often referred to as the maintenance of “alternative mating strategies” (reviewed in Shuster 2010) though this variation need not be strictly discrete (e.g. Shine *et al.* 2005; Noble *et al.* 2013).

The correlates of male encounter rates and reproductive success in the sampled population of *A. sagrei* offer some insight into what such context-dependent decision-making could look like. Unless spatial extent is correlated with other phenotypic traits, females have no way of discerning males’ spatial extent upon encountering them, suggesting that males’ decisions to traverse large distances likely only help them to encounter more potential mates. Thereafter, the number of encounters between male-female pairs is related to siring success, and a male could maximize his reproductive success by attempting to encounter a female repeatedly, though agonistic interactions with other males may prevent such attempts. Moreover, males’ siring success also depends on body size. Though, to some extent, a male could evaluate the sizes of his potential rivals through displays and agonistic interactions directed towards males in the vicinity of his potential mates, he has no certain way of deducing the sizes of males that a female has mated with previously if those males have since moved to different locations. Individual-based models that incorporate these various compounding influences on reproductive success could reveal if males can make adaptive context-dependent decisions to move or stay at particular locations based on their phenotype and the social and environmental situations they find themselves in.

Discerning if the decision rules used by individuals in a species are consistent across habitats and populations likely represents a promising way of understanding animal mating systems with any generality, and the Markov chain modelling approach presented here could be modified in future studies to incorporate both social and environmental variation influencing these decision rules—transition probabilities between locations could be scaled according to habitat preferences, occupancy of a location by specific individuals, and so on. Finer spatial and temporal scales of location sampling, made possible with the advancement of automated methods of tracking animals in the wild (Kays *et al.* 2015), could also allow for individual-level parameterization of any movement model, potentially improving the accuracy with which encounters are estimated. For example, 26 individual offspring (7% of total) were assigned sires not among the males estimated to encounter their mothers (see Supplementary Information)—it is possible that greater temporal resolution of location observations would in fact have detected the movements bringing about these encounters



and subsequent matings. At present, however, the size and cost of tracking or receiving devices and the spatial resolution of GPS data limit the range of taxa for which such methods can be employed.

Ultimately, even finer scale location sampling will be insufficient for determining which encounters in fact lead to matings—discovering this crucial aspect of animals' behavior will depend on focal animal observations of encounters in natural or naturalistic conditions. For a male, the gap between encountering a female and siring her offspring can include the sequential gauntlets of male-male competition, female mating preferences, and post-copulatory competition and choice—disentangling effects at these various levels will be essential to fully understanding how sexual selection shapes behavior, and will require close observation of animal interactions prior to and including mating.

However, movement behavior is a precursor to bringing about any of these interactions, and its quantification is therefore necessary for understanding the shape that sexual selection can take. In this paper, we develop a framework to quantify movement behavior spatiotemporally to estimate encounters between potential mates, and show that it reveals an infrequently-recognized opportunity for female mate choice in *Anolis* lizards, as well as evidence for selection for larger males across multiple levels of sexual selection. We hope that such a framework can help to organize disparate studies that approach sexual selection at different levels in a variety of animal taxa.

## Acknowledgements

This work was carried out under permit EXOT-15-09 from the U.S. Fish and Wildlife Service, and all procedures were approved under IACUC Protocol 26-11. Jonathan Suh, Claire Dufour, Rachel Moon, Bonnie Kircher, and Barbara Tamires de Silveira assisted with data collection. Thom Sanger, Tom Wichman, Steve Johnson, and Stuart McDaniel provided logistical support. Thom Sanger additionally advised on lizard husbandry and embryo collection. Ben de Bivort, Edward Burnell and Colin Donihue advised on the statistical analyses and, along with Yoel Stuart and Pavitra Muralidhar, provided comments that improved the manuscript. Hanna Wegener, Jason Kolbe, Anthony Geneva, and Pavitra Muralidhar advised on the genetic methods and analyses. All aspects of this research benefitted from feedback from members of the Losos Lab. This project was funded by a Young Explorers Grant from the National Geographic Society, a student research

grant from the Animal Behavior Society, the Robert A. Chapman Memorial Scholarship from Harvard University, and the John Templeton Foundation.

## Supplementary Information

### *Modelling lizard locations.*

As described in the main text, we modelled lizards' movements between locations using a Markov chain model, where transition probabilities were fitted as exponentially declining with the distance between locations (Equation 1 in main text). If  $\mathbf{M}$  is the transition matrix of the Markov chain model, and an individual lizard was observed at location  $A_m$  within hour  $T_m$  and then later at location  $A_n$  within hour  $T_n$ , then we calculated the probability that that individual was found at a particular location ( $L$ ) within the hour  $T \in (T_m, \dots, T_n)$  as follows:

$$P(L, T|A_m, T_m, A_n, T_n) = \frac{\mathbf{M}^{T-(T_m)+1}[A_m, L] \times \mathbf{M}^{(T_n)-T+1}[L, A_n]}{\sum_{i=1}^N \mathbf{M}^{T-(T_m)+1}[A_m, A_i] \times \mathbf{M}^{(T_n)-T+1}[A_i, A_n]}$$

$N$  is the total number of locations mapped; in our site, we mapped a total of 318 locations, which included not only locations at which lizards were observed but also trees within the site on which lizards were not observed but to which they might have moved. For the hours preceding the first observation and following the last observation for each individual, lizards were assumed to be equally likely to be anywhere in the site (i.e. the appropriate row or column of the transition matrix in equation 1 was replaced by a unit vector). In sum, after this procedure, we obtained, for each lizard, a vector of probabilities of the lizard being in each of the 318 locations within each hour during the sampling period.

### *Estimating Encounters*

To estimate whether or not a pair of lizards encountered one another, we first performed an element-wise multiplication of the two matrices of the individuals' probabilities of being at each location within each hour, and then summed probabilities across all locations for each hour in the resultant matrix for the pair. Probabilities were summed across locations so that two individuals that

may be moderately likely to co-occur at multiple locations could still be estimated as encountering one another.

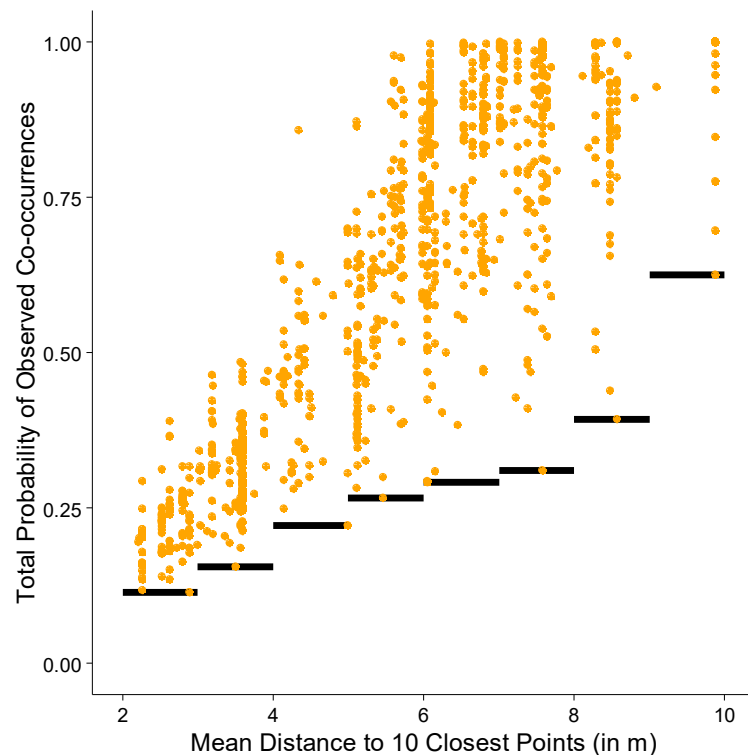

**Figure S1** Cutoffs (black horizontal lines) for defining encounters, based on the mean distance from each location to the ten closest locations. Points indicate the sum of probabilities of co-occurrences across all locations, for pairs of individuals at hours where the two were observed at the same location within an hour of one another.

The calculated probabilities of observed co-occurrences, defined as a pair of lizards observed in the same location within one hour of each other, were used to set the probability cutoff by which we defined whether or not other pairs of lizards encountered one another. These cutoffs depended on location. The 318 locations in this site were not uniformly distributed, with some locations clustered more closely together than others. When the probability of movement declines with distance, as modeled here, it is easier to leave a focal location that is close to other locations than it is to leave a relatively isolated location. Consequently, the estimated probability of remaining at the former location will be lower compared to the probability of leaving the latter location. We therefore set probability cutoffs to vary by the locations at which lizards in the pair were seen, on the basis of the focal locations' proximity to nearby locations. First, for the location of each observed co-occurrence, we calculated the mean distance to the ten closest locations to it, and saw that, as expected, the calculated probability of an encounter at that location between two lizards observed to co-occur increased with increasing distance to the ten closest points (Figure S1). We therefore

binned locations on the basis of these distances, into 1 m increments. The minimum probability calculated for observed co-occurrences in each bin, denoted by the black horizontal lines in Figure S1, was set as a cutoff for estimating whether or not an encounter took place, for all pairs of lizards for all hours in the sampling period. Of course, using such a distance-based probability cutoff to estimate encounters meant that we needed to assign a distance to all pairs of lizards for all hours. To do so, at each hour we considered the previous and next locations at which the lizards in the pair were observed, and found the minimum of the mean of the ten closest distances for these locations. For defining encounters (as a binary “yes/no” variable) for each pair of lizards at each hour, we assessed if the probability of their encounter at that hour was higher than the appropriate probability cutoff based on the assigned distance.

To assess the sensitivity of the number of male-female encounters to the probability cutoff described above, we repeated analyses using the 25% quartile instead of the minimum probability in each bin; a higher cutoff is more stringent, and will recover fewer encounters, but we were curious whether females would still be estimated as encountering multiple males across the sampling period. Not surprisingly, conservatively increasing the probability threshold for defining encounters from the minimum probability of observed co-occurrences to the 25% quartile reduced estimates of the number of potential mates encountered by both females ( $3.4 \pm 3.1$ ) and males ( $2.0 \pm 2.1$ ), but the potential for females to mate with multiple males remained.

Because boundary effects of a closed site might artificially increase the number of encounters, we also assessed if the number of male-female encounters was sensitive to treating the site as closed, by repeating the analyses described above with a simulated buffer of 50 locations placed randomly within 20 m around the perimeter of the site to which lizards could move. Adding a simulated buffer of 50 locations within 20 m of the site perimeter and allowing individuals to move to these locations did not alter estimates of the average number of males encountered by females ( $5.1 \pm 3.7$ ) or females encountered by males ( $2.9 \pm 3.0$ ).

### *Growth Curve for Males*

We estimated the growth curve of males in this population by fitting the following logistic equation (with parameters  $a$  and  $r$ ) to the observed data, using nonlinear least squares regression (Schoener and Schoener 1978):

$$L_2 = \frac{aL_1}{L_1 + (a - L_1)e^{rD}}$$

where  $L_1$  and  $L_2$  are the SVL of an individual measured at two successive captures, and  $D$  is the number of days between the two captures. We used this logistic growth curve model to estimate the SVL of each male on the day of each of his encounters, based on his SVL at the nearest capture. Parameters for the logistic growth curve for male SVL (Equation 3) were estimated to be  $a = 63.7$  and  $r = -0.016$ . Snout-vent lengths predicted by the model were highly correlated with measured SVLs ( $r^2 = 0.92$ ).

### *Paternity analysis*

Tests for sexual selection were performed on the paternity assignments in which candidate sires for offspring were the list of males their mother was estimated to have encountered (described in main text). However, we ran two further analyses. First, to assess if high paternity assignment rates in the main analysis were a consequence of restricting the number of candidate sires relative to the whole population, we also ran ten replicates of the analysis in which we sampled potential sires randomly from all 161 males, preserving the number of potential sires for each offspring individual and supplying the same group of potential sires for all offspring of a single female. Randomizing the identity but not the number of males encountered by each mother yielded 18% paternity assignment on average (13% to 24%, at an 80% confidence level), suggesting that the four-fold difference in assignment rates was due to identifying potential sires with greater accuracy based on their spatiotemporal movement patterns (assignment rate of 84% in the main analysis).

Second, we ran an analysis in which all sampled males were provided as candidate sires for all offspring. Simulation parameters specified for this analysis were 161 candidate sires and 0.96 proportion of males typed, based on the proportion of observations in the field that were of marked males. Paternity assignments were concordant for 80% of the individuals that were assigned paternity by both analyses. Of the remaining 39 individuals, the LOD scores for 21 mother-sire pairs differed between analyses by less than 1; these were considered false positives from the second analysis, and the assignments of the first paternity analysis were retained for downstream analysis. For the remaining 18 offspring, with mother-sire pairs where the LOD scores between the two analyses differed by more than 1, we found that results were not altered if we conducted

downstream hypothesis testing both including and excluding their paternity assignments from the first analysis.

Twenty-six individuals that were assigned paternity only when all males were provided as candidate sires. For these individuals, we calculated the minimum distance between any locations at which the mother and putative sire were observed, to assess the minimum distances that these individuals would have had to move to mate with one another. The minimum distance between locations at which mothers and sires of these 26 offspring were observed (regardless of *when* these lizards were found at those locations) ranged from 0 m to 56 m, with a median of 8.7 m.

### *Subsampling in Time and Space*

To understand the effect of limiting sampling in space or time on male-female home range overlap (i.e. how mating patterns have often been assessed in previous studies of anoles), we asked if a purely spatial predictor—the overlap in minimum convex polygons (MCPs) between pairs of individuals—is affected by subsampling from our dataset to match either the median area (400 m<sup>2</sup>) or the median duration of sampling (4 weeks) or both of previous studies (see Table S2 for studies and sample areas and durations included in the calculation of the medians).

On average, in the whole dataset, female MCPs overlap with those of  $12.8 \pm 8.7$  males, whereas male MCPs overlap with those of  $8.1 \pm 6.7$  females. In subsamples of a randomly selected area of 400 m<sup>2</sup> (repeated 404 times), we calculated that females overlapped a mean of  $5.5 \pm 3.1$  males and males overlapped a mean of  $2.3 \pm 1.2$  females. In subsamples of a duration of four weeks (for each of a possible 55 start dates), we calculated that females overlapped a mean of  $4.5 \pm 1.0$  males and males overlapped a mean of  $3.4 \pm 0.8$  females. In subsamples with a randomly selected area of 400 m<sup>2</sup> and duration of four weeks, we calculated that females overlapped a mean of  $2.4 \pm 1.9$  males and males overlapped a mean of  $1.5 \pm 1.0$  females. Thus, limited sampling in space or time decreases the number of mates inferred from spatial overlap of MCP estimates of home range. That said, at all scales of subsampling, we recovered that females overlap with multiple males, possibly suggesting that our study population may be dissimilar to many of those studied previously, and also hinting that limited sampling in space and time is not the full explanation for why previous studies of *Anolis* territoriality have largely ignored the potential for females to encounter and mate with multiple males (but see Tokarz 1998).

**Table S1**

| Locus | Reference              | Primers (5' – 3')                                  | Amplification Conditions* | Null allele frequency (for bolded loci, apparent homozygotes typed at only one allele) | Number of alleles |
|-------|------------------------|----------------------------------------------------|---------------------------|----------------------------------------------------------------------------------------|-------------------|
| S70   | Bardeleben et al. 2004 | GCAAGAGGTAGCCTCAGC<br>GTTATCAGTACGAGGCACTG         | TD1                       | -0.002                                                                                 | 18                |
| S77   | Bardeleben et al. 2004 | GAGTAAAGGTCTGGGTTCAGG<br>GCAGTACAAATACCACAGAGC     | TD1                       | -0.006                                                                                 | 16                |
| AC8   | Wordley et al. 2011    | CCCAATAGAGGAAAGGGACC<br>AGAATCACGCCTTCTGCTTT       | 57.7°C                    | <b>0.053</b>                                                                           | 10                |
| AC19  | Wordley et al. 2011    | GAAAAGTAGTGGGGCATTGG<br>AGTTTCCCAAGAAAACCCGT       | TD1                       | 0.007                                                                                  | 16                |
| AC45  | Wordley et al. 2011    | GCATCACCAGTCCCTTTG<br>GCTTTGGTTGAGTTGTATTGT<br>TTG | 57.7°C                    | <b>0.11</b>                                                                            | 6                 |
| G11   | J. Kolbe (pers. comm.) | GGTGCCACTGGGTATTCTGT<br>CTCAATCCTGCTGTCACCTG       | TD2                       | <b>0.16</b>                                                                            | 19                |

\*Amplification conditions:

1. 57.7°C: 95°C for 2', 35 cycles of 94°C for 45s, 57.7°C for 45s, 72°C for 1', 72°C for 10'.
2. TD1: 95°C for 5', 10 touchdown cycles of 95°C for 30s, 55°C – 50°C for 30s, 72°C for 45s, 25 cycles of 95°C for 30s, 50°C for 30s, 72°C for 45s, 72°C for 5'.
3. TD2: 95°C for 5', 10 touchdown cycles of 95°C for 30s, 64°C – 55°C for 30s, 72°C for 45s, 25 cycles of 95°C for 30s, 55°C for 30s, 72°C for 45s, 72°C for 5'.



**Table S2.** Sampling area and duration of previous studies on *Anolis* home ranges

Note that though the median duration is 3.5 weeks, a more conservative value of 4 weeks was used in the subsampling analysis above.

| Study                       | Sampling Area ( in m <sup>2</sup> ) | Sampling Duration (in weeks) |
|-----------------------------|-------------------------------------|------------------------------|
| Evans 1938                  | 150000                              | 3                            |
| Greenberg and Noble 1944    | 25                                  | 47                           |
| Gordon 1956                 | 400                                 | 52                           |
| Sexton et al. 1963          | 200                                 | 4                            |
| Rand 1967                   | 425                                 | 5                            |
| Jenssen 1970                | 930                                 | 8                            |
| Jackson 1973                | 14000                               | 1                            |
| Philibosian 1975            | 420                                 | 0.2                          |
| Stamps 1977                 | 9.5                                 | 5                            |
|                             | 34                                  | 13                           |
|                             | 47                                  | 13                           |
|                             | 37                                  | 15                           |
| Hicks and Trivers 1983      | 12000                               | 9                            |
| Ruby 1984                   | 441                                 | 28                           |
| Fleishman 1988              | 169                                 | 10                           |
| Jenssen and Nunez 1998      | 36                                  | 1                            |
| Tokarz 1998                 | 137                                 | 5                            |
| Pereira et al. 2002         | 12                                  | 1                            |
|                             | 70                                  | 1                            |
| Paterson 2002               | 400                                 | 1                            |
| McMann and Paterson 2003    | 400                                 | 1                            |
| Calsbeek 2009               | 1500                                | 2                            |
| Johnson et al. 2010         | 500                                 | 3                            |
| Nicholson and Richards 2011 | 14000                               | 52                           |
| Bush et al. 2016            | 875                                 | 3                            |
| Schoener and Schoener 1982  | 100                                 | —                            |
| Fitch and Henderson 1976    | —                                   | 1                            |
| Fitch and Henderson 1987    | —                                   | 2                            |
| Fobes et al. 1992.          | —                                   | 1.5                          |
| <b>Median</b>               | <b>400</b>                          | <b>3.5</b>                   |

## 1 References

- Andersson, M. (1994). *Sexual Selection*. Princeton University Press, Princeton, USA.
- Andrews, R.M. (1985). Male choice by females of the lizard, *Anolis carolinensis*. *J. Herp.*, 19, 284–289.
- Bardleben, C., Palchevskiy, V., Calsbeek, R., & Wayne, R.K. (2004). Isolation of polymorphic tetranucleotide microsatellite markers for the brown anole (*Anolis sagrei*). *Mol. Ecol. Notes*, 4, 176–178.

- 6 Birkhead, T.R., & Hunter, F.M. (1990). Mechanisms of sperm competition. *Trends Ecol. Evol.*, 5, 48–
- 7 52.
- 8 Bolker, B., & R Development Core Team. (2016). bbmle: Tools for General Maximum Likelihood
- 9 Estimation. R package version 1.0.18. <https://CRAN.R-project.org/package=bbmle>
- 10 Calsbeek, R. (2009). Sex-specific adult dispersal and its selective consequences in the brown anole,
- 11 *Anolis sagrei*. *J. Anim. Ecol.*, 78, 617–624.
- 12 Calsbeek, R., Bonneaud, C., Prabhu, S., Manoukis, N., & Smith, T.B. (2007). Multiple paternity and
- 13 sperm storage lead to increased genetic diversity in *Anolis* lizards. *Evol. Ecol. Res.* 9, 495–503.
- 14 Calsbeek, R., & Marnocha, E. (2006). Context dependent territory defense: The importance of
- 15 habitat structure in *Anolis sagrei*. *Ethology*, 112, 537–543.
- 16 Cooper Jr, W.E., & Vitt, L.J. (1993). Female mate choice of large male broad-headed skinks. *Anim.*
- 17 *Behav.*, 45, 683–693.
- 18 Cox, R.M., & Calsbeek, R. (2010). Cryptic sex-ratio bias provides indirect genetic benefits despite
- 19 sexual conflict. *Science* 328, 92–94.
- 20 Dougherty, L.R., & Shuker, D.M. (2015). The effect of experimental design on the measurement of
- 21 mate choice: a meta-analysis. *Behav. Ecol.*, 26, 311–319.
- 22 Duryea, M.C., Kern, A.D., Cox, R.M., & Calsbeek R. (2013). A novel application of approximate
- 23 Bayesian computation for detecting male reproductive advantages due to mating order. *Behav. Ecol.*
- 24 *Sociobiol.* 67, 1867–1875.
- 25 Emlen, S.T., & Oring, L.W. (1977). Ecology, sexual selection, and the evolution of mating systems.
- 26 *Science* 197, 215–223.
- 27 Fisher, M., & A. Muth. (1989). A technique for permanently marking lizards. *Herp. Rev.*, 20, 45–46.
- 28 Firman, R.C., Gasparini, C., Manier, M.K., & Pizzari, T. (2017). Postmating female control: 20 years
- 29 of cryptic female choice. *Trends Ecol.Evol.* 32, 368–382.
- 30 Friesen, C.R., Mason, R.T., Arnold, S.J., & Estes, S. (2014). Patterns of sperm use in two
- 31 populations of Red-sided Garter Snake (*Thamnophis sirtalis parietalis*) with long-term female sperm
- 32 storage. *Can. J. Zool.*, 92, 33–40.
- 33 Flanagan, S.P., & Bevier, C.R. (2014). Do male activity level and territory quality affect female
- 34 association time in the brown anole, *Anolis sagrei*? *Ethology*, 120, 365–374.
- 35 Harrison, A.S. (2014). *The evolution and diversity of the Anolis dewlap*. Dissertation, Harvard University,
- 36 Cambridge, USA.

- 37 Husak, J.F., Fox, S.F., Lovern, M.B., & van den Bussche, R.A. (2006). Faster lizards sire more
- 38 offspring: sexual selection on whole-animal performance. *Evolution*, 60, 2122–2130.
- 39 Jenssen, T.A., Lovern, M.B., & Congdon, J.D. (2001). Field-testing the protandry based mating
- 40 system for the lizard, *Anolis carolinensis*: does the model organism have the right model? *Behav. Ecol.*
- 41 *Sociobiol.*, 50, 162–172.
- 42 Jenssen, T.A. & Nunez, S.C. (1998). Spatial and breeding relationships of the lizard, *Anolis*
- 43 *carolinensis*: Evidence of intrasexual selection. *Behaviour*, 135, 981–1003.
- 44 Johansson, H., Surget-Groba, Y., & Thorpe, R.S. (2008). Microsatellite data show evidence for male-
- 45 biased dispersal in the Caribbean lizard *Anolis roquet*. *Mol. Ecol.*, 17, 4425–4432.
- 46 Johnson, M.A. (2007). *Behavioral ecology of Caribbean Anolis lizards: A comparative approach*. Dissertation,
- 47 Washington University, St. Louis, USA.
- 48 Jones, A.G. (2009). On the opportunity for sexual selection, the Bateman gradient and the maximum
- 49 intensity of sexual selection. *Evolution*, 63, 1673–1684.
- 50 Jones, A.G., & Ratterman, N.L. (2009). Mate choice and sexual selection: What have we learned
- 51 since Darwin? *Proc. Nat. Acad. Sci.*, 106, 10001–10008.
- 52 Kalinowski, S.T., Taper, M.L. & Marshall, T.C. (2007). Revising how the computer program
- 53 CERVUS accommodates genotyping error increases success in paternity assignment. *Mol. Ecol.*,
- 54 16, 1099–1106.
- 55 Kamath, A., & Losos, J.B. (2017). The erratic and contingent progression of research on
- 56 territoriality: a case study. *Behav. Ecol. Sociobiol.*, 71, 89.
- 57 Kays, R., Crofoot, M.C., Jetz, W., & Wikelski, M. (2015). Terrestrial animal tracking as an eye on life
- 58 and planet. *Science*, 348, aaa2478.
- 59 Kearse, M., Moir, R., Wilson, A., Stones-Havas, S., Cheung, M., Sturrock, S., *et al.* (2012). Geneious
- 60 Basic: an integrated and extendable desktop software platform for the organization and analysis of
- 61 sequence data. *Bioinformatics*, 28, 1647–1649.
- 62 Kokko, H., & Mappes, J. (2012). Multiple mating by females is a natural outcome of a null model of
- 63 mate encounters. *Entomol. Exp. Appl.* 146, 26–37.
- 64 Kolbe, J.J., Glor, R.E., Rodríguez-Schettino, L., Chamizo Lara, A.R., Larson, A. & Losos, J.B.
- 65 (2004). Genetic variation increases during biological invasion by a Cuban lizard. *Nature*, 431, 177–
- 66 181.
- 67 Kolbe, J. J., Larson, A., Losos, J.B., & de Queiroz, K. (2008). Admixture determines genetic diversity
- 68 and population differentiation in the biological invasion of a lizard species. *Biol. Lett.* 4, 434–437.

- 69 Kvarnemo, C., & Simmons, L. (2013). Polyandry as a mediator of sexual selection before and after  
70 mating. *Phil. Trans. R. Soc. B*, 368, 20120042.
- 71 Lailvaux, S.P., & Irschick, D.J. (2006). No evidence for female association with high-performance  
72 males in the green anole lizard, *Anolis carolinensis*. *Ethology*, 112, 707–715.
- 73 Le Bas, N.R. (2001). Microsatellite determination of male reproductive success in a natural  
74 population of the territorial ornate dragon lizard, *Ctenophorus ornatus*. *Mol. Ecol.*, 10, 193–203.
- 75 Losos, J.B. (2009). *Lizards in an evolutionary tree*. University of California Press, Berkeley, California,  
76 USA.
- 77 Maher, C.R., & Lott, D.F. (1995). Definitions of territoriality used in the study of variation in  
78 vertebrate spacing systems. *Anim. Behav.*, 49, 1581–1597
- 79 Morris, M.R. (1989). Female choice of large males in the treefrog *Hyla chrysoscelis*: the importance of  
80 identifying the scale of choice. *Behav. Ecol. Sociobiol.*, 25, 275–281.
- 81 Noble, D.W.A, Wechmann, K., Keogh, J.S., & Whiting, M.J. (2013). Behavioral and morphological  
82 traits interact to promote the evolution of alternative reproductive tactics in a lizard. *Am. Nat.*, 182,  
83 726–742.
- 84 Passek, K.M. (2002). *Extra-pair paternity within the female-defense polygyny of the lizard, Anolis carolinensis:*  
85 *Evidence of alternative mating strategies*. Dissertation, Virginia Polytechnic Institute, Blacksburg, USA.
- 86 R Core Team (2016). R: A language and environment for statistical computing. R Foundation for  
87 Statistical Computing, Vienna.
- 88 Rand, A.S. (1967). Ecology and social organization in the iguanid lizard *Anolis lineatopus*. *Proc. U.S.*  
89 *Nat. Mus.*, 122, 1–79.
- 90 Rasmussen, H.B., Okello, J.B.A., Wittemyer, G., Siegmund, H.R., Arctander, P., Vollrath, F.,  
91 Douglas-Hamilton, I. (2008). Age- and tactic-related paternity success in male African elephants.  
92 *Behav. Ecol.*, 19, 9–15.
- 93 Ruby, D.E. (1984). Male breeding success and differential access to females in *Anolis carolinensis*.  
94 *Herpetologica*, 40, 272–280.
- 95 Sanger, T.J., Hime, P.M., Johnson, M.J., Diani, J., & Losos, J.B. (2008). Laboratory protocols for  
96 husbandry and embryo collection of *Anolis* lizards. *Herpetol. Rev.*, 39, 58–63.
- 97 Schoener, T.W., & Schoener, A. (1978). Estimating and interpreting body-size growth in some *Anolis*  
98 lizards. *Copeia*, 1978, 390–405.
- 99 Schoener, T.W., & Schoener, A. (1980). Densities, sex ratios, and population structure in four  
100 species of Bahamian *Anolis* lizards. *J. Anim. Ecol.*, 49, 19–53.

- 101 Schoener, T.W., & Schoener, A. (1982). Intraspecific variation in home-range size in some *Anolis*
- 102 lizards. *Ecology*, 63, 809–823.
- 103 Shine, R., Langkilde, T., Wall, M., & Mason, R.T. (2005). Alternative male mating tactics in garter
- 104 snakes, *Thamnophis sirtalis parietalis*. *Anim. Behav.*, 70, 387–396.
- 105 Shuster, S.M. (2010). Alternative mating strategies. In: *Evolutionary Behavioral Ecology*. [eds.] Westneat,
- 106 D.F. & Fox, C.W. Oxford University Press, New York, USA, pp. 435–450.
- 107 Shuster, S.M., & Wade, M.J. (2003). *Mating systems and strategies*. Princeton University Press, Princeton,
- 108 USA.
- 109 Stamps, J.A. (1983). Sexual selection, sexual dimorphism, and territoriality. In: *Lizard Ecology*. [eds.]
- 110 Huey, R., Pianka, E.R., & Schoener, T.W. Harvard University Press, Cambridge, USA, pp 169–204.
- 111 Stamps, J.A. (1993). Sexual size dimorphism in species with asymptotic growth after maturity. *Biol. J.*
- 112 *Linn. Soc.*, 50, 123–145.
- 113 Tokarz, R.R. (1998). Mating pattern in the lizard *Anolis sagrei*: Implications for mate choice and
- 114 sperm competition. *Herpetologica*, 54, 388–394.
- 115 Trivers, R.L. (1976). Sexual selection and resource-accurring abilities in *Anolis garmani*. *Evolution*, 30,
- 116 253–269.
- 117 Wade, M.J. (1995). The ecology of sexual selection: mean crowding of females and resource-defence
- 118 polygyny. *Evol. Ecol.*, 9, 118–124.
- 119 Wagner Jr., W.E. (1998). Measuring female mating preferences. *Anim. Behav.*, 55, 1029–1042.
- 120 Wordley, C., Slate, J., & Stapley, J. (2011). Mining online genomic resources in *Anolis carolinensis*
- 121 facilitates rapid and inexpensive development of cross-species microsatellite markers for the *Anolis*
- 122 lizard genus. *Mol. Ecol. Resour.*, 11, 126–133.

123

## 124 **References for Supplementary information including Table S2:**

- 125 Bardeleben, C., Palchevskiy, V., Calsbeek, R., & Wayne, R.K. 2004. Isolation of polymorphic
- 126 tetranucleotide microsatellite markers for the brown anole (*Anolis sagrei*). *Mol. Ecol. Notes*, 4, 176–178.
- 127 Birkhead, T.R., & Hunter, F.M. (1990). Mechanisms of sperm competition. *Trends in Ecology and*
- 128 *Evolution* 5: 48–52.
- 129 Bush, J.M., M.M. Quinn, E.C. Balreira, M.A. Johnson. 2016. How do lizards determine dominance?
- 130 Applying ranking algorithms to animal social behaviour. *Animal Behaviour* 118: 65–74.

- 131 Calsbeek, R. 2009. Sex-specific adult dispersal and its selective consequences in the brown anole,  
132 *Anolis sagrei*. *Journal of Animal Ecology* 78: 617–624.
- 133 Evans, L.T. 1938. Cuban field studies on the territoriality of the lizard *Anolis sagrei*. *Journal of*  
134 *Comparative Psychology* 25: 97–125.
- 135 Fitch, H.S., and R.W. Henderson. 1976. A field study of the rock anoles (Reptilia, Lacertilia,  
136 Iguanidae) of Southern Mexico. *Journal of Herpetology* 10: 303–311.
- 137 Fitch, H.S., and R.W. Henderson. 1987. Ecological and ethological parameters in *Anolis baborucoensis*,  
138 a species having rudimentary development of the dewlap. *Amphibia-Reptilia* 8: 69–80.
- 139 Fleishman, L.J. 1988. The social behavior of *Anolis auratus*, a grass anole from Panama. *Journal of*  
140 *Herpetology* 22: 13–23.
- 141 Fobes, T.M., R. Powell, J.S. Parmerlee Jr., A. Lathrop, and D.D. Smith. 1992. Natural history of  
142 *Anolis cybotes* (Sauria: Polychridae) from an altered habitat in Barahona, Dominican Republic.  
143 *Caribbean Journal of Science* 28: 200–207.
- 144 Gordon, R.E. 1956. The biology and biodemography of *Anolis carolinensis carolinensis* Voight. Ph.D.  
145 Dissertation, Tulane University.
- 146 Greenberg, B., and G.K. Noble. 1944. Social behavior of the American chameleon (*Anolis*  
147 *carolinensis* Voight). *Physiological Zoology* 17: 392 – 439.
- 148 Hicks, R.M., and R.L. Trivers. 1983. The social behavior of *Anolis valencienni*. Pp. 570 – 595 *In* G.J.  
149 Rhodin, and K. Miyata. *Recent Advances in Herpetology and Evolutionary Biology*. Museum of Comparative  
150 Zoology, Cambridge, MA, USA.
- 151 Jackson, J.F. 1973. Notes on the population biology of *Anolis tropidonotus* in a Honduran highland  
152 pine forest. *Journal of Herpetology* 7: 309–311.
- 153 Jenssen, T.A. 1970. The ethoecology of *Anolis nebulosus* (Sauria, Iguanidae). *Journal of Herpetology*,  
154 4: 1–38.
- 155 Jenssen, T.A., and S.C. Nunez. 1998. Spatial and breeding relationships of the lizard, *Anolis*  
156 *carolinensis*: Evidence of intrasexual selection. *Behaviour* 135: 981–1003.
- 157 Johnson, M.A., L.J. Revell, and J.B. Losos. 2010. Behavioral convergence and adaptive radiation:  
158 effects of habitat use on territorial behavior in *Anolis* lizards. *Evolution* 64: 1151–1159.
- 159 McMann, S., and A.V. Paterson. 2003. The relationship between location and displays in a territorial  
160 lizard. *Journal of Herpetology* 37: 414–416.



- 161 Nicholson, K.E., and P.M. Richards. 2011. Home-range size and overlap within an introduced  
162 population of the Cuban knight anole, *Anolis equestris* (Squamata: Iguanidae). *Phyllomedusa* 10: 65–  
163 73.
- 164 Paterson, A.V. 2002. Effects of an individual's removal on space use and behavior in territorial  
165 neighborhoods of brown anoles (*Anolis sagrei*). *Herpetologica* 58: 382–393.
- 166 Pereira, H.M., S.R. Loarie, and J. Roughgarden. 2002. Monogamy, polygyny and interspecific  
167 interactions in the lizards *Anolis pogus* and *Anolis gingivinus*. *Caribbean Journal of Science* 38: 132–136.
- 168 Philibosian, R. 1975. Territorial behavior and population regulation in the lizards, *Anolis acutus* and  
169 *A. cristatellus*. *Copeia* 1975: 428–444.
- 170 Rand, A.S. 1967. Ecology and social organization in the iguanid lizard *Anolis lineatopus*. *Proceedings*  
171 *of the United States National Museum* 122: 1–79.
- 172 Ruby, D.E. 1984. Male breeding success and differential access to females in *Anolis carolinensis*.  
173 *Herpetologica* 40: 272–280.
- 174 Schoener, T.W., and A. Schoener. 1982. Intraspecific variation in home-range size in some *Anolis*  
175 lizards. *Ecology* 63: 809–823.
- 176 Sexton, O.J., H.F. Heatwole, and E.H. Meseth. 1963. Seasonal population changes in the lizard,  
177 *Anolis limifrons*, in Panama. *The American Midland Naturalist* 69: 482–491.
- 178 Stamps, J.A. 1977a. The relationship between resource competition, risk, and aggression in a tropical  
179 territorial lizard. *Ecology* 58: 349–358.
- 180 Tokarz, R.R. 1998. Mating pattern in the lizard *Anolis sagrei*: Implications for mate choice and sperm  
181 competition. *Herpetologica* 54: 388–394.
- 182 Wordley, C., Slate, J., & Stapley, J. 2011. Mining online genomic resources in *Anolis carolinensis*  
183 facilitates rapid and inexpensive development of cross-species microsatellite markers for the *Anolis*  
184 lizard genus. *Molecular Ecology Resources*, 11: 126–133.
